# Supplementary material for: The small heat shock protein 20 RSI2 interacts with and is required for stability and function of tomato resistance protein I-2
Source: PubMed Central journal article supplement (PMC2988412; doi:10.1111/j.1365-313x.2010.04260.x), 2010-06-16

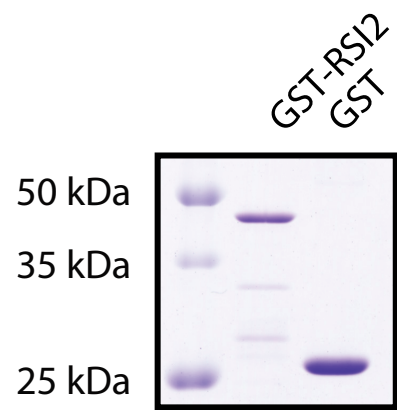

Supplement: tpj0063-0563-SD3.pdf [file tpj0063-0563-SD3.pdf]
